1 **TITLE:** Conserved tandem arginines for PbgA/YejM allow *Salmonella* to regulate LpxC  
2 and control lipopolysaccharide biogenesis during infection.

3

4 **AUTHORS:** Nicole P. Giordano, Joshua A. Mettlach and Zachary D. Dalebroux\*

5 **EMAILS:** Nicole-Giordano@ouhsc.edu, Joshua-Mettlach@ouhsc.edu,  
6 zdalebro@ouhsc.edu

7 **AFFILIATIONS:** Department of Microbiology and Immunology, University of Oklahoma  
8 Health Sciences Center, 940 Stanton L. Young Blvd., BMSB 1053, Oklahoma City, OK  
9 73104.

10 **\*Correspondence to:**

11 Zachary David Dalebroux, Ph.D.

12 (734)-255-9330

13 zdalebro@ouhsc.edu

14

15 **RUNNING TITLE:** Salmonellae regulate LpxC for virulence.

16

17 **KEYWORDS:** PbgA, YejM, LpxC, LapB, YciM, FtsH, lipopolysaccharide, LPS, lipid A,  
18 core oligosaccharide, O-antigen, bacteremia, non-typhoidal, outer membrane, lipid  
19 remodeling, lipid regulation, bacterial membrane, protease, proteolysis

20

21 **ABSTRACT**

22 *Salmonella enterica* serovar Typhimurium uses PbgA/YejM, a conserved multi-  
23 pass transmembrane protein with a soluble periplasmic domain (PD), to balance the  
24 glycerophospholipid (GPL) and lipopolysaccharide (LPS) concentrations within the outer  
25 membrane (OM). The lipid homeostasis and virulence defects of *pbgAΔ191-586*  
26 mutants, which are deleted for the PD, can be suppressed by substitutions in three LPS  
27 regulators, LapB/YciM, FtsH, and LpxC. We reasoned that *S. Typhimurium* uses the  
28 PbgA PD to regulate LpxC through functional interactions with LapB and FtsH. In the  
29 stationary phase of growth, *pbgAΔ191-586* mutants accumulated LpxC and  
30 overproduced LPS precursors, known as lipid A-core molecules. Trans-  
31 complementation fully decreased the LpxC and lipid A-core levels for the mutants, while  
32 substitutions in LapB, FtsH, and LpxC variably reduced the concentrations. PbgA binds  
33 lipid A-core, in part, using dual arginines, R215 and R216, which are located near the  
34 plasma membrane. Neutral, conservative, and non-conservative substitutions were  
35 engineered at these positions to test whether the side-chain charges for residues 215  
36 and 216 influenced LpxC regulation. Salmonellae that expressed PbgA with dual  
37 alanines or aspartic acids overproduced LpxC, accumulated lipid A-core and short-LPS  
38 molecules, and were severely attenuated in mice. Bacteria that expressed PbgA with  
39 tandem lysines were fully virulent in mice and yielded LpxC and lipid A-core levels that  
40 were similar to the wild type. Thus, *S. Typhimurium* uses the cationic charge of PbgA  
41 R215 and R216 to down-regulate LpxC and decrease lipid A-core biosynthesis in  
42 response to host stress and this regulatory mechanism enhances their virulence during  
43 bacteremia.

44 **IMPORTANCE**

45 *Salmonella enterica* serovar Typhimurium causes self-limiting gastroenteritis in  
46 healthy individuals and severe systemic disease in immunocompromised humans. The  
47 pathogen manipulates the immune system of its host by regulating the lipid, protein, and  
48 polysaccharide content of the outer membrane (OM) bilayer. Lipopolysaccharides (LPS)  
49 comprise the external leaflet of the OM, and are essential for establishing the OM  
50 barrier and providing gram-negative microbes with intrinsic antimicrobial resistance.  
51 LPS molecules are potent endotoxins and immunomodulatory ligands that bind host-  
52 pattern receptors, which control host resistance and adaptation during infection.  
53 Salmonellae use the cationic charge of dual arginines for PbgA/YejM to negatively  
54 regulate LPS biosynthesis. The mechanism involves PbgA binding to an LPS precursor  
55 and activating a conserved multi-protein signal transduction network that cues LpxC  
56 proteolysis, the rate-limiting enzyme. The cationic charge of the tandem arginines is  
57 critical for the ability of salmonellae to survive intracellularly and to cause systemic  
58 disease in mice.  
59

## 60 INTRODUCTION

61 *Salmonella enterica* serovar Typhimurium (*S. Typhimurium*) infects humans that  
62 have ingested contaminated food or water, or that have interacted with companion  
63 animals or livestock (1, 2). The resulting gastroenteritis is highly inflammatory but mostly  
64 self-limiting and rarely requires therapeutics. Immunocompromised humans are  
65 susceptible to non-typhoidal bacteremia, a systemic disease that occurs when  
66 pathogens penetrate the mucosal and epithelial barriers of the intestine, enter the  
67 lymphatic system, and eventually inhabit the bloodstream (1). During systemic infection,  
68 *S. Typhimurium* largely survives as a facultative intracellular pathogen and manipulates  
69 the immune system of its host from within the endocytic vacuoles of macrophages and  
70 dendritic cells (3). The acidic pH and environment of the late endosome causes *S.*  
71 *Typhimurium* to increase the activity of a multitude of regulatory proteins and  
72 mechanisms, many of which control the glycerophospholipid (GPL) and  
73 lipopolysaccharide (LPS) content of the outer membrane (OM) (4). Maintaining and  
74 regulating OM-lipid content is critical to nearly every aspect of *S. Typhimurium*  
75 pathogenesis and contributes to intrinsic antimicrobial resistance (4-6).

76 The OM is an asymmetrical bilayer of GPLs in the inner leaflet and  
77 lipopolysaccharides (LPS) in the outer leaflet (7-11). The asymmetric character of the  
78 OM allows to the peripheral bilayer to function as a physiochemical barrier, which  
79 promotes defensive functions (12, 13). Lipid A molecules are multi-acylated,  
80 phosphorylated disaccharolipids that comprise the OM outer leaflet. Lipid A is the  
81 amphipathic component of LPS that directly interacts with GPLs (12, 13). Divalent  
82 cations form salt-bridges between adjacent phosphates on lipid A molecules to provide

83 lateral stability to the surface, and hydrophobic interactions between the acyl chains of  
84 LPS and GPL molecules establish the barrier (12, 14, 15). The biochemical properties  
85 of the OM enhance enterobacterial resistance to small hydrophobic antibiotics and  
86 promote virulence and disease pathogenesis (4, 7, 13, 16-18).

87 Enterobacteriaceae use the Lpx, Kdt, and Waa/Rfa enzymes to independently  
88 synthesize the lipid-A disaccharolipids and the core oligosaccharides in the cytosol.  
89 Next, lipid A and core oligosaccharide are assembled into lipid A-core, the principal LPS  
90 precursor. This occurs on the cytoplasmic leaflet of the plasma membrane (13, 19-22).  
91 MsbA flips lipid A-core molecules into the periplasmic leaflet of the IM where WaaL/RfaL  
92 ligates lipid A-core to the O-polysaccharides (also known as O-antigens) (13, 21, 22).  
93 Enteropathogenic *E. coli* and *S. enterica* produce LPS molecules that are decorated  
94 with O-antigens of varying polysaccharide chain length (5, 16, 21, 23). The O-antigens  
95 are synthesized in the cytosol and attached to undecaprenyl phosphate (Und-P) carrier  
96 lipids at the inner leaflet of the IM. Und-P-linked O-antigen conjugates are flipped into  
97 the periplasmic leaflet of the IM and polymerized (13, 24). *S. Typhimurium* uses at least  
98 two polymerases to produce three O-antigen LPS subtypes, the short (2-15 repeating  
99 units; RU), long (16-35 RU), and very long (>100 RU) LPS modalities (4, 24). The LPS  
100 structures are transported outward across the periplasm and inserted into the outer  
101 leaflet of the OM by the Lpt machinery (20-22). Lipid A-core molecules that are devoid  
102 of the O-antigen are also transported to the OM and are intrinsic components of the  
103 outer leaflet; thus, O-antigen attachment is not a prerequisite for transport **(5, 13, 22)**.

104 During stress, enterobacteriaceae regulate wholesale production of lipid A-core  
105 and LPS molecules by decreasing the rate of biosynthesis. This occurs through a

106 proteolytic mechanism, which involves LapB/YciM, FtsH, and LpxC (16, 25). LapB is an  
107 IM-tethered cytosolic protein whose expression and activity levels increase during  
108 stress (25-29). LpxC is a cytosolic deacetylase that catalyzes a rate-limiting step for lipid  
109 A-core biosynthesis. Activated LapB molecules prompt the IM protease, FtsH, to  
110 degrade LpxC; however, the signals that control LapB and FtsH activity on LpxC are  
111 poorly understood (13, 16, 19). *E. coli* LapB binds both LpxC and FtsH and influences  
112 LpxC stability, but the specificity of the LapB-LpxC and LapB-FtsH interactions are not  
113 known (27, 30). Current literature classifies LapB and FtsH as negative regulators of  
114 enterobacterial LPS biosynthesis (27-29).

115 Work from our lab and others unveiled a fourth component of this regulatory  
116 network, PbgA/YejM (5, 31-34). PbgA is an essential IM protein with a large non-  
117 essential periplasmic domain (PD) (5, 35). *S. Typhimurium* relies on the PD of PbgA to  
118 control the levels of lipid A-core on the OM, in part, through functional interactions with  
119 LapB, FtsH, and LpxC (5, 35). The *S. Typhimurium* and *E. coli* PbgA and LapB proteins  
120 exhibit a high degree of sequence identity (88.23% and 93.4% identity, respectively). *E.*  
121 *coli* PbgA interacts with LapB through the transmembrane (TM) domains. The essential  
122 function of PbgA in laboratory *E. coli* K-12 involves stabilizing LpxC; however these  
123 domestic microbes produce a lipid A-core glycolipid on their OM outer leaflet that lacks  
124 the O-antigen (5, 31-34). High-resolution crystal structures of the *S. Typhimurium* and  
125 *E. coli* PbgA proteins revealed a lipid A-core molecule bound, in part, via tandem  
126 arginines, R215 R216, in the non-essential basic region of the PD (34, 35). In a  
127 previous study, we demonstrated that *S. Typhimurium* uses the PbgA R215 R216 to  
128 enhance the OM-barrier, but we had not tested the role of these residues in regulating

129 LpxC and lipid A-core (35). We interrogated the hypothesis that *S. Typhimurium* uses  
130 the PbgA PD and electrostatic interactions mediated by R215 R216 to negatively  
131 regulate LpxC and control LPS abundance during stress. We provide data to support  
132 this prediction and demonstrate that the mechanism enhances the ability of *S.*  
133 *Typhimurium* to survive intracellularly in phagocytes, as well as to colonize and kill mice  
134 during systemic disease.

135

## 136 RESULTS

137 ***S. Typhimurium* uses the periplasmic domain (PD) of PbgA/YejM to negatively**  
138 **regulate LpxC during stress.** To determine the contribution of PbgA to LpxC  
139 regulation, we compared our wild-type *S. Typhimurium* 14028s genotype and two site-  
140 directed deletion-insertion mutants, *pbgAΔ191-586* and *pbgAΔ328-586*, which are  
141 deleted for the entire PD or a portion of the globular region for the PD, respectively  
142 (**Table 1**) (5, 35). Trans-complementation was achieved by basally expressing PbgA in  
143 the *pbgAΔ191-586* mutants from the multi-copy plasmid, pBAD24 (36).

144 *S. Typhimurium* LpxC is a roughly 33-kDa (kD) soluble polypeptide that is  
145 localized to the cytosol. During logarithmic growth, LpxC is turned over at a specific rate  
146 by proteolysis. During stress, the rate of FtsH activity on LpxC increases causing LpxC  
147 and LPS and lipid A-core levels to decrease (37, 38). We focused our attention on the  
148 stationary phase of growth (16 hour time point denoted on the curve with a star), **Fig**  
149 **1A)** for *S. Typhimurium* to test for PbgA-mediated LpxC regulation (**Fig. 1B**). Bacterial  
150 lysates were assessed for their LpxC abundance by immunoblotting soluble fractions.  
151 Stationary phase wild-type (*pbgA+*) bacteria produced modest but detectable levels of

152 the 33 kD form of LpxC (**Fig. 1B**). Arabinose induction of plasmid-borne LpxC caused a  
153 slight over-accumulation of this band relative to the empty vector control genotype,  
154 suggesting this is likely LpxC (**Fig. S1**). Consistent with the PD of PbgA promoting LpxC  
155 down-regulation, the *pbgAΔ191-586* and *pbgAΔ328-586* mutants accumulated the 33  
156 kD LpxC band in the stationary phase of growth (**Fig 1B**). The LpxC levels for the  
157 *pbgAΔ191-586* mutants were consistently greater than for the *pbgAΔ328-586* mutants,  
158 suggesting some differential involvement of the PD sub-regions (basic and globular)  
159 exists in regards to regulating LpxC concentrations (**Fig. 1B**). The growth rate of  
160 *pbgAΔ191-586* mutant *S. Typhimurium* severely contracts near the log-to-stationary  
161 phase transition in nutrient-rich broth media (5) (**Fig. 1A**). The differential effects on  
162 LpxC may influence the bacterial growth rate since, unlike the *pbgAΔ191-586* mutants  
163 the *pbgAΔ328-586* mutants were not similarly attenuated for growth. Trans-  
164 complementation of the *pbgAΔ191-586* mutants with PbgA fully decreased the LpxC  
165 levels and restored the growth pattern to wild type (**Fig. 1A-B**). In the log phase of  
166 growth ( $OD_{600} = 0.6-0.8$ ), wild type and *pbgA* mutants produced equivalent levels of  
167 LpxC under these conditions (**Fig. S2**). Therefore, *S. Typhimurium* requires the PbgA  
168 PD to negatively regulate LpxC in response to stationary-phase stress.

169

170 **Non-synonymous substitutions in LapB, FtsH, and LpxC variably reduce the**  
171 **LpxC levels for the *pbgAΔ191-586* mutants.** Our previous suppressor screen yielded  
172 *pbgAΔ191-586* isolates with non-synonymous substitutions in LapB/YciM, FtsH, and  
173 LpxC (5). The mutations partially restore the growth, lipid A-core accumulation, and



174 virulence defects of the *pbgAΔ191-586* mutants (5). However, we had not determined  
175 whether these extragenic mutations influenced the level of LpxC.

176 After culturing to the stationary phase, wild-type bacteria produced modest levels  
177 of the 33 kD polypeptide, while *pbgAΔ191-586* mutants routinely yielded a marked  
178 increase (**Fig. 1C**). Relative to the parental mutant genotype, each of the suppressor  
179 mutants measured a discernable decrease in the levels of LpxC (5) (**Fig 1C**). Therefore,  
180 the suppressive mutations in LapB, FtsH, and LpxC commonly decrease the LpxC  
181 levels for the *pbgAΔ191-586* mutants to restore lipid homeostasis and virulence.

182

183 **S. Typhimurium uses the PbgA PD to negatively regulate lipid A-core levels during**  
184 **stress.** To determine whether PbgA-mediated effects on LpxC impacted lipid-A core and  
185 LPS biosynthesis, we extracted LPS molecules from identical numbers of viable  
186 stationary-phase bacteria and analyzed the relative glycolipid composition by using  
187 denaturing gel electrophoresis and staining with ProQ Emerald 300 (5). Lipid A-core (LA-  
188 C) and short LPS molecules with 1-4 O-antigen repeating units (S1-S4) migrate between  
189 10 and 30 kD and are the best resolved glycolipids in the gels. Our analysis focused on  
190 these bands to quantify differences and determine significance (5).

191 *S. Typhimurium* produces fewer LPS molecules per cell in stationary phase than  
192 in log phase growth (**Fig. 2A**) (7, 39, 40). The decrease is partly dependent on the PbgA  
193 PD, since *pbgAΔ191-586*-mutants produced qualitatively greater levels of LPS relative to  
194 the wild type in stationary phase (**Fig. 2A**). Specifically, the lipid A-core levels for the  
195 mutants were significantly four-times greater than the wild type and the trans-  
196 complemented genotype (**Fig. 2B**). The *pbgAΔ328-586* mutants did not accumulate lipid

197 A-core compared to the wild type despite the routine accumulation of LpxC in these  
198 bacteria, albeit to levels that were generally less than the *pbgA*Δ191-586 mutants (**Fig.**  
199 **1B, Fig. 2A-B**) (5). Neither mutant exhibited a significant difference in the amount of  
200 short LPS molecules produced (**Fig. 2B**). Therefore, *S. Typhimurium* uses the PbgA PD  
201 to negatively regulate LpxC and decrease lipid A-core biogenesis during stress.

202

203 **S. Typhimurium uses the cationic charge of the PbgA R215 R216 side chains, but**  
204 **not the R231 R232 side chains, to negatively regulate LpxC and lipid A-core levels**  
205 **during stress.** The basic region of PbgA is a series of helices and loops that connect  
206 the fifth TM segment and the globular region of the PD (**Fig. 3A**) (34, 41). The basic  
207 region contains two consecutive helices, each with a pair of dual arginines, R215 R216  
208 and R231 R232. The arginine pairs are highly conserved among enterobacteriaceae  
209 (**Fig. S3**) (34, 35, 41). PbgA interacts with the 1-phospho-GlcNAc atoms of lipid A-core  
210 via the R216 side-chain atoms, and the R215 and R216 backbone atoms (**Fig. 3B**) (34).  
211 The side-chain atoms of R215 form a stabilizing intramolecular contact with the side-  
212 chain atoms of residue D192 (34). To test whether the arginine pairs contribute to LpxC  
213 regulation, we generated neutral, conservative, and non-conservative charge  
214 substitutions at these positions and used a trans-complementation approach.

215 Relative to the *pbgA*Δ191-586 mutants expressing the vector, the mutants  
216 expressing the PbgA R215A R216A and R231A R232A proteins did not elicit  
217 measurable growth defects in broth media and the proteins were stably expressed (**Fig.**  
218 **1B, Fig. 3C**). The *pbgA*Δ191-586 mutants expressing the empty vector produced robust  
219 levels of the 33 kD LpxC polypeptide (**Fig. 1B, Fig. 3D**). Consistent with the first pair of

220 tandem arginines playing a role, the level of LpxC was consistently elevated in the PbgA  
221 R215A R216A mutants compared to the wild type and the trans-complemented mutant;  
222 however, not to the level of the *pbgA* $\Delta$ 191-586 mutants (**Fig. 3D**). *S. Typhimurium* PbgA  
223 R231A R232A mutants produced near wild type LpxC levels (**Fig. 3D**). Therefore, *S.*  
224 *Typhimurium* relies on PbgA R215 R216, but not R231 R232 for stress-induced down-  
225 regulation of LpxC.

226 We tested whether the cationic charge of the side chains of PbgA R215 R216  
227 were important for regulating LpxC by substituting for dual lysines or aspartic acids. Like  
228 for the wild type and alanine-substituted proteins, the lysine and aspartic acid-  
229 substituted variants rescued the stationary-phase growth defect of the *pbgA* $\Delta$ 191-586  
230 mutant strain; however, the aspartic acid protein variants were lowly expressed and  
231 possibly unstable in comparison to the wild type and other mutant proteins (**Fig. 1A,**  
232 **Fig. 3C**). The cationic charge of R215 R216 is likely necessary for regulating LpxC,  
233 since the lysine-substituted PbgA variants expressed wild-type levels of LpxC in  
234 stationary phase (**Fig. 3D**). The *pbgA* $\Delta$ 191-586-mutant *S. Typhimurium* that expressed  
235 the non-conservative charge substitutions, R215D R216D, accumulated LpxC to a  
236 greater level than the alanine mutants, but the level was still less than the parental  
237 mutant control bacteria, suggesting the attenuated proteins still partly restore the LpxC  
238 phenotype of the deletion mutant (**Fig. 3C-D**). These findings support that side-chain  
239 interactions mediated by PbgA residues R215 R216 allow *S. Typhimurium* to negatively  
240 regulate LpxC in response to stress and that additional residues in the PD are likely  
241 involved.

242 Consistent with the increased abundance of LpxC, the PbgA R215A R216A and  
243 R215D R216D mutants produced significantly greater levels of lipid A-core and short-  
244 LPS molecules compared to the wild type and the complemented mutant (**Fig. 4A-B**).  
245 Consistent with the LpxC levels, the PbgA R215D R216D mutants accumulated greater  
246 levels of lipid A-core than the R215A R216A mutants; however, the levels of short-LPS  
247 were invariant between the two genotypes (**Fig. 3D, Fig. 4A-B**). Like for LpxC  
248 expression, the levels of lipid A-core and short LPS molecules in the PbgA R215K  
249 R216K and R231A R232A mutants were statistically the same as the wild type and  
250 complemented mutant (**Fig. 3D, Fig. 4A-B**). Therefore, *S. Typhimurium* relies on the  
251 cationic charge of the PbgA R215 R216 to negatively regulate LpxC and this allows the  
252 bacteria to influence the level of lipid A-core during stress.

253

254 **The cationic charges of PbgA R215 and R216 are necessary for *S. Typhimurium***  
255 **to survive intracellularly in macrophages.** *S. Typhimurium* survives in the endocytic  
256 vacuoles of macrophages to cause systemic disease in mice and this requires the PbgA  
257 PD (5, 35). To assess the contribution of the dual arginines to intracellular survival,  
258 primary bone marrow derived macrophages (BMDMs) from C57Bl/6J mice were  
259 infected with the aforementioned genotypes (5). At both time points post infection, the  
260 cfu levels of the wild type, the complemented mutant, and the mutants expressing PbgA  
261 R215K R216K and R231A R232A reached approximately  $10^5$  cfu/mL and did not  
262 statistically vary from one another (**Fig. 5**). By contrast, the *pbgA* $\Delta$ 191-586 mutants  
263 expressing empty vectors were recovered at  $10^4$  cfu/mL less than for the wild type and  
264 the complemented mutant at 2 and 6 hours post infection (**Fig. 5**). The *pbgA* $\Delta$ 328-586

265 mutants expressing empty vectors were recovered at  $10^2$  cfu/mL less than wild type  
266 **(Fig. 5)**. Salmonellae expressing PbgA R215A R216A and PbgA R215D R216D were  
267 partly attenuated and were recovered at  $10^{1-2}$  cfu/mL less than wild type, at both time  
268 points **(Fig. 5)**. The findings indicate that the cationic charges of the side chains for  
269 PbgA R215 R216 are partly necessary for PbgA's role in enhancing *S. Typhimurium*  
270 intracellular survival in macrophages.

271

272 **The side chain charges of PbgA R215 and R216 are necessary for *S. Typhimurium***  
273 **to colonize the spleens and livers of C57Bl/6J mice.** *S. Typhimurium* uses the PD of  
274 PbgA to cause systemic disease and lethal bacteremia in mice, so we next tested  
275 whether the side-chain charges of the dual arginines were necessary (5). Male and  
276 female wild-type C57Bl/6J animals were intraperitoneally inoculated with approximately  
277  $10^5$  cfu. At 48 hours, the animals were euthanized and the livers and spleens of the  
278 mice were homogenized. Mice infected with the wild type, the complemented mutant,  
279 and the mutant expressing PbgA R215K R216K or R231A R232A contained statistically  
280 identical numbers, approximately  $10^{7-9}$  cfu/gram of organ tissue **(Fig. 6A-B)**. In contrast,  
281 the *pbgA* $\Delta$ 191-586 and *pbgA* $\Delta$ 328-586 mutant controls were severely attenuated and  
282 only  $10^{1-2}$  cfu were recovered **(Fig. 6A-B)**. Mice infected with the PbgA R215A R216A  
283 and R215D R216D mutants were colonized with up to  $10^{2-4}$  cfu/gram of organ, which  
284 was statistically identical to the *pbgA* $\Delta$ 191-586 mutant controls **(Fig. 6A-B)**. Therefore,  
285 *S. Typhimurium* uses the cationic charges of PbgA R215 R216 to enhance colonization  
286 in mice following intraperitoneal injection.

287

288 **S. Typhimurium relies on PbgA R215 R216 and R231 R232 to cause lethal**  
289 **bacteremia in C57Bl/6J mice.** *S. Typhimurium* *pbgA* $\Delta$ 191-586 suppressor mutants  
290 that encode the LpxC<sup>Y113C</sup> substitution persist in mice without causing lethality (5). The  
291 mechanism involves Toll-like receptor 4 (Tlr4), which is the innate immune receptor that  
292 binds to the lipid A-core moiety of LPS and controls immune activation and antimicrobial  
293 defenses in response to gram-negative bacteria (5, 6). Therefore, we sought to test  
294 whether the two pairs of dual arginines were necessary for the ability of *S. Typhimurium*  
295 to kill wild type and Tlr4-deficient mice.

296 Wild-type male or female animals were intraperitoneally infected with 10<sup>3</sup> cfu and  
297 monitored for signs of morbidity and mortality for twenty-one days. Infections with wild-  
298 type *S. Typhimurium* were lethal to the wild-type C57Bl/6J mice by 5 days, while the  
299 infections with the *pbgA* $\Delta$ 191-586 mutants *pbgA* $\Delta$ 328-586 were not lethal throughout  
300 the 21-day duration (**Fig. 7A**). *pbgA* $\Delta$ 191-586 mutants expressing wild-type PbgA and  
301 the conservative charge substitutions, R215K R216K, killed all of the wild-type animals  
302 by day 8 and 9 respectively, with a mean survival of 7 days post infection (dpi) for both  
303 groups (**Fig. 7A**). The mean days of survival did not vary between the groups infected  
304 with the complemented mutant and the mutant expressing PbgA R215K R216K, but the  
305 mean days of survival for mice infected with these strains was significantly longer than  
306 for the group infected with the wild type *S. Typhimurium* (**Fig. 7A**). Therefore, the trans-  
307 complementation approach did not fully restore the PbgA-dependent toxicity phenotype  
308 in our mouse model, under these conditions. This was consistent in mice lacking Tlr4,  
309 which survived an average of 3 days when infected with the wild-type *S. Typhimurium*,  
310 but an average of five days for mice infected with the complemented mutants or

311 mutants expressing PbgA R215K R216K (**Fig. 7B**). The *pbgAΔ191-586* and *pbgAΔ328-*  
312 *586* mutant infections were not lethal to the Tlr4-deficient animals. Similarly, the  
313 infections with the *pbgAΔ191-586* mutants expressing PbgA R215A R216A and R215D  
314 R216D were not toxic to the animals under these conditions (**Fig. 7B**). These data are  
315 consistent with *S. Typhimurium* relying on the cationic charge of PbgA R215 R216 to  
316 colonize and kill mice.

317 In the two-day colonization experiments, *S. Typhimurium pbgAΔ191-586* mutants  
318 expressing PbgA R231A R232A colonized mice to levels that were invariant from the  
319 wild type (**Fig. 6A-B**). However, in the lethality assay, the wild-type C57Bl6/J mice  
320 infected with PbgA R231A R232A mutants did not perish (**Fig. 7A**). In contrast to the  
321 *pbgAΔ191-586* mutants, which were cleared from all infected animals, the mice infected  
322 with PbgA R231A R232A still harbored roughly  $10^{4-5}$  salmonellae, indicating that these  
323 dual arginines also contribute to PbgA-mediated virulence mechanisms (**Fig. S4**). Tlr4-  
324 deficient C57Bl6/J mice that were infected with the PbgA R231A R232A mutants were  
325 killed by 13 dpi with a mean survival of 9 dpi, yielding  $10^{8-9}$  salmonellae at the time of  
326 death (**Fig. 6D, Fig. 6F**). Therefore, the low dose time-to-death studies suggest that *S.*  
327 *Typhimurium* requires PbgA R231 R232 to cause lethality in mice in a manner that  
328 involves Tlr4.

329

## 330 **DISCUSSION**

331 This work supports that *S. Typhimurium* uses the cationic charges of two  
332 consecutive arginines for PbgA/YejM to negatively regulate lipid A-core biosynthesis in  
333 response to stress. The sensory and signal transduction mechanism likely involves

334 contributions from the IM-anchored cytosolic protein, LapB/YciM, and the integral IM  
335 protease FtsH, and the ability of LapB-FtsH to negatively regulate the level of LpxC in  
336 the cytosol (**Fig. S5**). PbgA's contribution to regulating LpxC is critical for *S.*  
337 Typhimurium to survive in macrophages and to cause systemic disease mice (**Fig. 5**;  
338 **Fig. 6**). The need for *S. Typhimurium* to down-regulate lipid A-core biogenesis during  
339 intracellular survival and systemic pathogenesis could have multiple biological  
340 purposes.

341 In the resource allocation model, the ability to negatively regulate LpxC and lipid  
342 A-core biogenesis serves as a mechanism by which enterobacteriaceae free up fatty  
343 acid and N-acetyl glucosamine substrates for use in other metabolic pathways (30, 39,  
344 40, 42, 43). Instead of a strategy to preserve key metabolites, enterobacterial down-  
345 regulation of lipid A-core biosynthesis might alternatively serve an offensive purpose (6).  
346 The bilayer couple model of outer membrane vesicle (OMV) formation predicts that  
347 increasing the level of an amphipathic molecule in the OM outer leaflet causes the outer  
348 leaflet to expand relative to the inner leaflet. Insertion and expansion of the outer leaflet  
349 induces curvature and vesicle formation (44). Perhaps conditions in host environments  
350 elicit *S. Typhimurium* to produce more GPLs on the outer leaflet and fewer lipid A-core  
351 and LPS molecules. We have established that *S. Typhimurium* constitutively invert  
352 GPLs into the outer leaflet of the OM where they become substrates for lipid A-core and  
353 phosphatidylglycerol acylation by the PagP enzyme (45, 46). Stress-induced decreases  
354 in LPS could be coordinated with increased phospholipid inversion to regulate vesicle  
355 formation in the acidic environment of phagocyte endosomes. By this rationale, the  
356 periplasmic arginines for PbgA/YejM may sense lipid anions, such as lipid A-core, that



357 accumulate in the IM to regulate vesicle formation under stressful conditions that *S.*  
358 *Typhimurium* encounter in the host.

359 High-resolution crystal structures of PbgA reveal contacts between lipid A-core  
360 and the backbone of R215, as well as the side chain of R216 (**Fig. 3B**) (34, 41). The  
361 R215 side chain also forms a contact with the D192 side chain, which is positioned near  
362 the C-terminal end of fifth TM segment (34). Since salmonellae expressing PbgA with  
363 dual lysine substitutions are not defective in regulating LpxC, surviving in macrophages,  
364 or causing systemic pathogenesis in mice, but salmonellae with dual alanine  
365 substitutions are defective, the data support that electrostatic side-chain interactions  
366 between R216 and lipid A-core, and between R215 and D192 contribute to PbgA's  
367 ability to regulate LpxC.

368 The prevailing data support that PbgA R215 R216 participate in electrostatic  
369 interactions that are necessary for *S. Typhimurium* to down-regulate LpxC and  
370 decrease lipid A-core biosynthesis in response to stress. Biochemical studies in *E. coli*  
371 indicate that PbgA binds LapB through the TM regions of each protein (31, 34). *E. coli*  
372 LapB binds FtsH and LpxC, but the residues that are necessary are are not known (27).  
373 *E. coli* PbgA R215A R216A mutant proteins maintain interactions with LapB, so we  
374 predict that PbgA-LapB binding is not directly impacted by the interactions of R215 and  
375 R216 (34).

376 In our model, we hypothesize in non-hazardous and replete environments, *S.*  
377 *Typhimurium* PbgA binds LapB and holds it in an inactive conformation (**Fig. S5**).  
378 During stress, an anionic lipid molecule, perhaps lipid A-core, accumulates at the  
379 periplasmic leaflet of the IM and binds PbgA R215 R216. PbgA-lipid A-core binding

380 causes a putative conformational change in the PbgA-LapB complex, which alters the  
381 proteolytic activity of FtsH on LpxC (**Fig. S5**). Unlike the wild type, the R215A R216A,  
382 and R215K R216K mutant proteins, the R215D R216D mutant proteins are lowly  
383 expressed and possibly unstable compared to the wild type and other mutant proteins  
384 (**Fig. 3C**). Like the dual alanine mutants, the dual aspartic acid mutants are highly  
385 defective at restoring the virulence defects of the parental mutant genotype, but are  
386 capable of restoring the growth defect of the parental mutant genotype in broth culture  
387 (**Fig. 1A**). Since the lysine-substituted proteins are not defective for regulating LpxC or  
388 lipid A-core, and are as virulent as the wild type control, our results indicate that the  
389 cationic charge of the side chains of these residues likely enables PbgA to regulate  
390 LpxC (**Fig. 3D, Fig. 4-7**).

391 During structural analysis, a second pair of consecutive arginines at positions  
392 231 and 232 attracted our attention (**Fig. S3**) (35). We predicted that these residues  
393 might similarly contribute to *S. Typhimurium* LpxC regulation. However, the results  
394 suggest that these arginines are not required for salmonellae to regulate LpxC and lipid  
395 A-core during stress under the *in vitro* conditions we tested here, nor are they  
396 necessary for *S. Typhimurium* to survive in mouse macrophages, nor mouse spleens  
397 nor livers after intraperitoneal injection (**Figs. 3C; Fig. 4-6**). In contrast, the mouse  
398 lethality studies support that PbgA R231A R232A mutants are not toxic to wild type  
399 animals at low doses, and that the mutant salmonellae persist at moderate titers in the  
400 spleens and livers for at least 21 days (**Fig. 7A**). This persistence phenotype resembled  
401 that of the *pbgA*Δ191-586 *lpxC*<sup>Y113C</sup> suppressor mutant (5). Like for the suppressor  
402 genotype, the PbgA R231A R232A infections were lethal to Tlr4-deficient animals with a

403 mean time-to-death of 14 days for the mutant compared to 3 days for the wild type  
404 control (**Fig. 7B**). Collectively, these results suggest that *S. Typhimurium* uses PbgA to  
405 influence the host-immune response to lipid A-core, and to enhance virulence by  
406 multiple mechanisms. Future biochemical and phenotypic assays will deduce the exact  
407 role of PbgA R231 R232 in *S. Typhimurium* pathogenesis.

408 Our results continue to support a critical role for the PbgA PD in regulating OM  
409 lipid homeostasis and disease pathogenesis in *S. Typhimurium*. The recent surge of  
410 experimental attention on PbgA/YejM in proteobacteria indicates that knowledge of the  
411 biochemical mechanisms for PbgA-LapB and LapB-FtsH mediated LpxC regulation will  
412 be critical to understanding antimicrobial resistance and the immune response to enteric  
413 pathogens.

414

## 415 **METHODS**

416 **Ethics statement:** All animal procedures were carried out with approval from the  
417 University of Oklahoma Health Sciences Center Institutional Animal Care and Use  
418 Committee under protocol number 19-015-ACI. The procedures used in this study  
419 strictly adhered to the guidelines found in the National Research Council's Guide for the  
420 Care and Use of Laboratory Animals (National Research Council. 2011. Guide for the  
421 Care and Use of Laboratory Animals, 8<sup>th</sup> ed. National Academies Press, Washington  
422 DC.)

423

424 **Bacterial Strains and Culturing Conditions:** The bacterial strains used in this study  
425 were all derivatives of the *Salmonella enterica* serovar Typhimurium genotype 14028s,

426 which contains a chromosomally-integrated *wza-lacZ* gene promoter fusion (Table 1)  
427 (47). Suppressors of *pbgAΔ191-586::tetRA* were isolated in a previously published  
428 suppressor screen and streaked onto Luria-Bertani agar plates containing the LacZ  
429 indicator substrate, 5-Bromo-4-Chloro-3-Indolyl β-D-Galactopyranoside (X-gal) at a  
430 concentration of 20μg/mL (5). All other strains in this study contain the pBAD24 plasmid,  
431 which was either left empty or contained the full-length PbgA protein (35, 36). Each  
432 plasmid-bearing strain was streaked onto Luria-Bertani agar plates containing X-gal at a  
433 concentration of 20μg/mL and 100μg/mL ampicillin to maintain the pBAD24 plasmid.  
434 The bacteria were isolated from -80°C glycerol stocks, weekly. Cultures were routinely  
435 started with a single colony inoculated into LB-broth medium and shaken, or rotated at  
436 250 revolutions per minute, aerobically at 37°C. Ampicillin was added to the growth  
437 medium to maintain the plasmids. Log phase was defined as an optical density at  
438 600nm (OD<sub>600</sub>) of 0.6 to 0.8, and stationary phase growth was determined to be 16h  
439 post single-colony inoculation (**Fig. 1A**) (5). The complementation genotype contains  
440 the full-length protein basally expressed from the pBAD24 plasmid in the *pbgAΔ191-586*  
441 mutant strain background. Arabinose was used for overexpression (36).

442

443 **Genetics:** The *pbgAΔ191-586::tetRA* and *pbgAΔ328-586::tetRA* insertion-deletion  
444 mutants were generated by methods previously described (35). Point mutants were  
445 generated using overlapping PCR primers, both containing the desired mutations  
446 (**Table 2**). The template for the PCR reaction was purified pBAD24-PbgA, which was  
447 generated by methods previously described (35). AccuPrime™ Pfx DNA polymerase  
448 (Thermo) and the corresponding buffer were used in 50μL reactions. PCR products

449 were Dpn1 treated for one hour at 37°C and isolated using the GeneJET PCR  
450 Purification Kit (Thermo). The DNA was then transformed into DH5 $\alpha$  and single colonies  
451 of the transformants were grown overnight. Plasmids were purified using the GeneJET  
452 Plasmid Miniprep Kit (Thermo) and mutations were confirmed by sequencing. The  
453 mutated plasmids were then electroporated into competent *pbgA $\Delta$ 191-586::tetRA* cells.

454

455 **Clearing of PbgA antisera:** Anti-PbgA antibodies were cleared from rabbit antisera as  
456 previously described (35). 5mL of rabbit antisera was eluted over a protein-A column  
457 (Thermo) to isolate Fc/Fab fragments. Non-specific *S. Typhimurium* cross-reacting  
458 antibodies were cleared by incubating 50 $\mu$ L of the Fc/Fab elution with 50 $\mu$ L of bacterial  
459 cell lysate of *pbgA $\Delta$ 191-586::tetRA* mutant *S. Typhimurium* in 50mM Tris-HCl pH 8.0  
460 10mM EDTA and 5% non-fat dried milk for 4 hours at room temperature. We routinely  
461 observed a contaminating band in the deletion mutant that was roughly 40 kD. The  
462 antisera were raised against PbgA191-586 peptides and the remaining TM coding  
463 sequence on the genome of *pbgA $\Delta$ 191-586::tetRA* is predicted to be ~ 22.5 kD.

464

465 **Western Blotting:** For all western blots, bacteria was grown in 0.5L, for PbgA blots, or  
466 1L, for LpxC blots, of LB broth supplemented with 100 $\mu$ L/mL ampicillin. Bradford  
467 assays were used to measure the protein concentration of total membrane fractions  
468 (PbgA blots) or soluble fractions (LpxC blots). 20 $\mu$ g of protein was loaded onto a 12%  
469 SDS-PAGE gel, electrophoresed, and transferred onto a polyvinylidene fluoride (PVDF)  
470 membrane using the Mini Trans-Blot Cell (BioRad) apparatus for wet transfer at 100  
471 volts for 50 minutes. The membrane was washed in Tris-buffer saline with tween 20

472 (TBST) and blocked overnight at 4°C in 5% non-fat dried milk in TBST. For PbgA, the  
473 primary antibody was diluted 1:250 in TBST and applied to the blocked membrane and  
474 incubated at room temperature for 2 hours. For LpxC, the primary antibody  
475 (MyBioSource) was diluted 1:10,000 in TBST, applied to the blocked membrane, and  
476 incubated at room temperature for 1 hour. For both, PbgA and LpxC blots, the anti-  
477 rabbit-HRP secondary antibody (Cell Signaling) was diluted 1:5000 in TBST and  
478 incubated for 1 hour at room temperature. Blots were imaged after detection with  
479 Amersham ECL Prime Western Blotting Detection reagent (GE Healthcare) using the  
480 BioRad ChemiDoc MP Imager.

481

482 **Growth Curve:** Growth curves were generated in a Bioscreen C growth curve analyzer.  
483 A single colony was resuspended in 180µL LB broth with ampicillin (100µg/mL) and  
484 serially diluted to 10<sup>-3</sup> to assess growth patterns of the deletion mutants and point  
485 mutants. Bacteria were incubated with continuous agitation and OD<sub>600</sub> was measured  
486 and recorded every 15 minutes. Five biological replicates were performed for each  
487 bacterial strain and the results reflect the average.

488

489 **LPS extraction and visualization:** This method was slightly modified from Cian et al,  
490 2019 (5). Bacteria were cultured in 5mL Luria-Bertani Broth (LB broth) supplemented  
491 with 100µg/mL ampicillin. Each strain was normalized to an OD<sub>600</sub> of 2.5, spun down in  
492 a 1.5mL microcentrifuge tube, and resuspended in 200µL of sterile water. To confirm  
493 that we were extracting from the same number of viable bacteria, 20µL of the 200µL  
494 resuspension was plated on LB-agar plates containing ampicillin (100µg/mL) and the

495 cfu/mL values were compared and shown to be statistically identical across  
496 experiments. 2 $\mu$ L of 2% SDS were added to the remaining 180 $\mu$ L, which was then  
497 incubated in a boiling water bath for ten minutes. After cooling, 5 $\mu$ L of proteinase K  
498 (New England BioLabs) was added to each sample and the samples were incubated  
499 overnight in a 59°C water bath. 182 $\mu$ L hot phenol was added to each sample and the  
500 samples were incubated at 68°C for 10 minutes and immediately transferred to an ice  
501 water bath for an additional 10 minutes. The samples were spun down in a temperature-  
502 controlled microcentrifuge at 4°C and 4500 rpm for 10 minutes and immediately placed  
503 back in the ice water bath. The top LPS-containing aqueous layer was transferred to a  
504 new 1.5mL microcentrifuge tube. For visualization, samples were combined with 4x  
505 Laemmli Sample Buffer (BioRad) and loaded into a 4-20% SDS-PAGE gradient gel  
506 (Mini-PROTEAN<sup>®</sup> TGX<sup>™</sup> Precast Gel; BioRad). The gel was stained according to the  
507 ProQ Emerald 300 lipopolysaccharide staining kit (Thermo) protocol.

508 **Murine macrophage infections:** Primary bone marrow-derived murine macrophages  
509 (BMDMs) were prepared by harvesting the marrow from the femurs of 6- to 8- week old  
510 C57Bl/6J mice bred in-house (5). Macrophages were seeded at 2.5x10<sup>5</sup> cells per well  
511 and infected at a multiplicity of infection of 10. Infected macrophages were incubated at  
512 37°C under 5%CO<sub>2</sub> for 1h. The infected cells were washed and aspirated three times  
513 with phosphate-buffered saline (PBS) to remove extracellular bacteria. RPMI+FBS with  
514 100 $\mu$ g/ml of gentamycin was added to kill remaining extracellular bacteria. Infected cells  
515 were incubated for an additional 1h at 37°C under 5%CO<sub>2</sub>. At 2h post-infection (hpi),  
516 PBS+0.1% Triton was added for lysis and monolayers were gently scraped and  
517 collected with a pipette. Three wells per bacterial genotype were assessed per time

518 point. Surviving intracellular colony-forming units (cfu) were enumerated by plating  
519 serial dilutions in PBS. After 2 hpi, the wells for the 6hpi time point were aspirated and  
520 RPMI+FBS containing 10µg/ml of gentamycin was added to kill bacteria that became  
521 extracellular during infection. At 6hpi, macrophages were lysed and surviving  
522 intracellular cfu were enumerated.

523 **Mouse infections:** Male and female C57Bl/6J mice were purchased from The Jackson  
524 Laboratory and bred in-house under pathogen-free conditions. To measure the ability of  
525 *S. Typhimurium* to survive systemically and colonize the spleens and livers of mice, 6-  
526 to 8-week old mice were intraperitoneally infected with roughly  $5 \times 10^5$  cfu diluted in PBS.  
527 At 48 hours, the mice were euthanized and the livers and spleens were dissected,  
528 weighed, and homogenized in PBS-0.1% triton X-100. They were then serially diluted  
529 and plated on LB-agar plates supplemented with X-gal (20µg/mL) and ampicillin  
530 (100µg/mg) to enumerate colony-forming units.

531 For time-to-death assays, mice were intraperitoneally inoculated with  $5 \times 10^3$  CFU  
532 diluted in PBS. Mice were sacrificed either at death, defined by physical signs of  
533 distress and weight loss, or at the twenty-one-day end point. CFU were enumerated as  
534 outlined for the two-day infection.

535

536 **Statistical analysis:** All statistical analyses were performed and graphs were prepared  
537 using GraphPad Prism (version 8; GraphPad Software, La Jolla, CA, USA).

538

539 **Acknowledgements:** We would like to acknowledge the other members of the  
540 Dalebroux Lab including Meli Cian, Keaton Minor, and Aaron Zahn who provided



541 experimental and technical advice throughout the project. This work was funded by  
542 grant 5T32AI007633-17, awarded to Nicole P. Giordano, and grants P20GM10344 and  
543 R01AI139248, awarded to Z. D. Dalebroux.

## 544 REFERENCES

- 545 1. Keestra-Gounder AM, Tsolis RM, Baumler AJ. 2015. Now you see me, now you  
546 don't: the interaction of *Salmonella* with innate immune receptors. *Nat Rev*  
547 *Microbiol* 13:206-16.
- 548 2. Kurtz JR, Goggins JA, McLachlan JB. 2017. *Salmonella* infection: Interplay  
549 between the bacteria and host immune system. *Immunol Lett* 190:42-50.
- 550 3. LaRock DL, Chaudhary A, Miller SI. 2015. *Salmonellae* interactions with host  
551 processes. *Nat Rev Microbiol* 13:191-205.
- 552 4. Dalebroux ZD, Miller SI. 2014. *Salmonellae* PhoPQ regulation of the outer  
553 membrane to resist innate immunity. *Curr Opin Microbiol* 17:106-13.
- 554 5. Cian MB, Giordano NP, Masilamani R, Minor KE, Dalebroux ZD. 2019.  
555 *Salmonella enterica* Serovar Typhimurium Uses PbgA/YejM To Regulate  
556 Lipopolysaccharide Assembly during Bacteremia. *Infect Immun* 88.
- 557 6. Giordano NP, Cian MB, Dalebroux ZD. 2020. Outer Membrane Lipid Secretion  
558 and the Innate Immune Response to Gram-Negative Bacteria. *Infect Immun* 88.
- 559 7. May KL, Silhavy TJ. 2017. Making a membrane on the other side of the wall.  
560 *Biochim Biophys Acta Mol Cell Biol Lipids* 1862:1386-1393.
- 561 8. Silhavy TJ, Kahne D, Walker S. 2010. The bacterial cell envelope. *Cold Spring*  
562 *Harb Perspect Biol* 2:a000414.
- 563 9. Ames GF. 1968. Lipids of *Salmonella typhimurium* and *Escherichia coli*: structure  
564 and metabolism. *J Bacteriol* 95:833-43.
- 565 10. Osborn MJ, Gander JE, Parisi E. 1972. Mechanism of assembly of the outer  
566 membrane of *Salmonella typhimurium*. Site of synthesis of lipopolysaccharide. *J*  
567 *Biol Chem* 247:3973-86.
- 568 11. Olsen RW, Ballou CE. 1971. Acyl phosphatidylglycerol. A new phospholipid from  
569 *Salmonella typhimurium*. *J Biol Chem* 246:3305-13.
- 570 12. Henderson JC, Zimmerman SM, Crofts AA, Boll JM, Kuhns LG, Herrera CM,  
571 Trent MS. 2016. The Power of Asymmetry: Architecture and Assembly of the  
572 Gram-Negative Outer Membrane Lipid Bilayer. *Annu Rev Microbiol* 70:255-78.
- 573 13. Bertani B, Ruiz N. 2018. Function and Biogenesis of Lipopolysaccharides.  
574 *EcoSal Plus* 8.
- 575 14. Simpson BW, Trent MS. 2019. Pushing the envelope: LPS modifications and  
576 their consequences. *Nat Rev Microbiol* 17:403-416.
- 577 15. Needham BD, Trent MS. 2013. Fortifying the barrier: the impact of lipid A  
578 remodelling on bacterial pathogenesis. *Nat Rev Microbiol* 11:467-81.
- 579 16. Raetz CR, Whitfield C. 2002. Lipopolysaccharide endotoxins. *Annu Rev Biochem*  
580 71:635-700.
- 581 17. Nikaido H. 2003. Molecular basis of bacterial outer membrane permeability  
582 revisited. *Microbiol Mol Biol Rev* 67:593-656.
- 583 18. Lundstedt E, Kahne D, Ruiz N. 2020. Assembly and Maintenance of Lipids at the  
584 Bacterial Outer Membrane. *Chem Rev* doi:10.1021/acs.chemrev.0c00587.
- 585 19. Zhou P, Zhao J. 2017. Structure, inhibition, and regulation of essential lipid A  
586 enzymes. *Biochim Biophys Acta Mol Cell Biol Lipids* 1862:1424-1438.

- 587 20. Simpson BW, May JM, Sherman DJ, Kahne D, Ruiz N. 2015. Lipopolysaccharide  
588 transport to the cell surface: biosynthesis and extraction from the inner  
589 membrane. *Philos Trans R Soc Lond B Biol Sci* 370.
- 590 21. Whitfield C, Trent MS. 2014. Biosynthesis and export of bacterial  
591 lipopolysaccharides. *Annu Rev Biochem* 83:99-128.
- 592 22. May JM, Sherman DJ, Simpson BW, Ruiz N, Kahne D. 2015. Lipopolysaccharide  
593 transport to the cell surface: periplasmic transport and assembly into the outer  
594 membrane. *Philos Trans R Soc Lond B Biol Sci* 370.
- 595 23. Smith AE, Kim SH, Liu F, Jia W, Vinogradov E, Gyles CL, Bishop RE. 2008.  
596 PagP activation in the outer membrane triggers R3 core oligosaccharide  
597 truncation in the cytoplasm of *Escherichia coli* O157:H7. *J Biol Chem* 283:4332-  
598 43.
- 599 24. Kalynychn S, Morona R, Cygler M. 2014. Progress in understanding the assembly  
600 process of bacterial O-antigen. *FEMS Microbiol Rev* 38:1048-65.
- 601 25. Klein G, Raina S. 2019. Regulated Assembly of LPS, Its Structural Alterations  
602 and Cellular Response to LPS Defects. *Int J Mol Sci* 20.
- 603 26. Bittner LM, Arends J, Narberhaus F. 2017. When, how and why? Regulated  
604 proteolysis by the essential FtsH protease in *Escherichia coli*. *Biol Chem*  
605 398:625-635.
- 606 27. Klein G, Kobylak N, Lindner B, Stupak A, Raina S. 2014. Assembly of  
607 lipopolysaccharide in *Escherichia coli* requires the essential LapB heat shock  
608 protein. *J Biol Chem* 289:14829-53.
- 609 28. Mahalakshmi S, Sunayana MR, SaiSree L, Reddy M. 2014. *yciM* is an essential  
610 gene required for regulation of lipopolysaccharide synthesis in *Escherichia coli*.  
611 *Mol Microbiol* 91:145-57.
- 612 29. Nicolaes V, El Hajjaji H, Davis RM, Van der Henst C, Depuydt M, Leverrier P,  
613 Aertsen A, Haufroid V, Ollagnier de Choudens S, De Bolle X, Ruiz N, Collet JF.  
614 2014. Insights into the function of YciM, a heat shock membrane protein required  
615 to maintain envelope integrity in *Escherichia coli*. *J Bacteriol* 196:300-9.
- 616 30. Emiola A, Andrews SS, Heller C, George J. 2016. Crosstalk between the  
617 lipopolysaccharide and phospholipid pathways during outer membrane  
618 biogenesis in *Escherichia coli*. *Proc Natl Acad Sci U S A* 113:3108-13.
- 619 31. Fivenson EM, Bernhardt TG. 2020. An essential membrane protein modulates  
620 the proteolysis of LpxC to control lipopolysaccharide synthesis in *Escherichia*  
621 *coli*. *mBio* 11.
- 622 32. Guest RL, Same Guerra D, Wissler M, Grimm J, Silhavy TJ. 2020. YejM  
623 Modulates Activity of the YciM/FtsH Protease Complex To Prevent Lethal  
624 Accumulation of Lipopolysaccharide. *mBio* 11.
- 625 33. Nguyen D, Kelly K, Qiu N, Misra R. 2020. YejM Controls LpxC Levels by  
626 Regulating Protease Activity of the FtsH/YciM Complex of *Escherichia coli*. *J*  
627 *Bacteriol* 202.
- 628 34. Clairfeuille T, Buchholz KR, Li Q, Verschueren E, Liu P, Sangaraju D, Park S,  
629 Noland CL, Storek KM, Nickerson NN, Martin L, Dela Vega T, Miu A, Reeder J,  
630 Ruiz-Gonzalez M, Swem D, Han G, DePonte DP, Hunter MS, Gati C, Shahidi-  
631 Latham S, Xu M, Skelton N, Sellers BD, Skippington E, Sandoval W, Hanan EJ,

- 632 Payandeh J, Rutherford ST. 2020. Structure of the essential inner membrane  
633 lipopolysaccharide-PbgA complex. *Nature* 584:479-483.
- 634 35. Dalebroux ZD, Edrozo MB, Pfuetzner RA, Ressler S, Kulasekara BR, Blanc MP,  
635 Miller SI. 2015. Delivery of cardiolipins to the Salmonella outer membrane is  
636 necessary for survival within host tissues and virulence. *Cell Host Microbe*  
637 17:441-51.
- 638 36. Guzman LM, Belin D, Carson MJ, Beckwith J. 1995. Tight regulation, modulation,  
639 and high-level expression by vectors containing the arabinose PBAD promoter. *J*  
640 *Bacteriol* 177:4121-30.
- 641 37. Fuhrer F, Langklotz S, Narberhaus F. 2006. The C-terminal end of LpxC is  
642 required for degradation by the FtsH protease. *Mol Microbiol* 59:1025-36.
- 643 38. Fuhrer F, Muller A, Baumann H, Langklotz S, Kutscher B, Narberhaus F. 2007.  
644 Sequence and length recognition of the C-terminal turnover element of LpxC, a  
645 soluble substrate of the membrane-bound FtsH protease. *J Mol Biol* 372:485-96.
- 646 39. Thomanek N, Arends J, Lindemann C, Barkovits K, Meyer HE, Marcus K,  
647 Narberhaus F. 2018. Intricate Crosstalk Between Lipopolysaccharide,  
648 Phospholipid and Fatty Acid Metabolism in Escherichia coli Modulates  
649 Proteolysis of LpxC. *Front Microbiol* 9:3285.
- 650 40. Schakermann M, Langklotz S, Narberhaus F. 2013. FtsH-mediated coordination  
651 of lipopolysaccharide biosynthesis in Escherichia coli correlates with the growth  
652 rate and the alarmone (p)ppGpp. *J Bacteriol* 195:1912-9.
- 653 41. Fan J, Petersen EM, Hinds TR, Zheng N, Miller SI. 2020. Structure of an Inner  
654 Membrane Protein Required for PhoPQ-Regulated Increases in Outer Membrane  
655 Cardiolipin. *mBio* 11.
- 656 42. Mostafavi M, Wang L, Xie L, Takeoka KT, Richie DL, Casey F, Ruzin A, Sawyer  
657 WS, Rath CM, Wei JR, Dean CR. 2018. Interplay of Klebsiella pneumoniae fabZ  
658 and lpxC Mutations Leads to LpxC Inhibitor-Dependent Growth Resulting from  
659 Loss of Membrane Homeostasis. *mSphere* 3.
- 660 43. Zeng D, Zhao J, Chung HS, Guan Z, Raetz CR, Zhou P. 2013. Mutants resistant  
661 to LpxC inhibitors by rebalancing cellular homeostasis. *J Biol Chem* 288:5475-86.
- 662 44. Schertzer JW, Whiteley M. 2012. A bilayer-couple model of bacterial outer  
663 membrane vesicle biogenesis. *mBio* 3.
- 664 45. Bishop RE, Gibbons HS, Guina T, Trent MS, Miller SI, Raetz CR. 2000. Transfer  
665 of palmitate from phospholipids to lipid A in outer membranes of gram-negative  
666 bacteria. *EMBO J* 19:5071-80.
- 667 46. Dalebroux ZD, Matamouros S, Whittington D, Bishop RE, Miller SI. 2014. PhoPQ  
668 regulates acidic glycerophospholipid content of the Salmonella Typhimurium  
669 outer membrane. *Proc Natl Acad Sci U S A* 111:1963-8.
- 670 47. Farris C, Sanowar S, Bader MW, Pfuetzner R, Miller SI. 2010. Antimicrobial  
671 peptides activate the Rcs regulon through the outer membrane lipoprotein RcsF.  
672 *J Bacteriol* 192:4894-903.
- 673

674

## 675 TABLES

676 Table 1. Bacterial strains and plasmids used in this study

| Strain or plasmid                                     | Genotype and notes                                                               | Reference  |
|-------------------------------------------------------|----------------------------------------------------------------------------------|------------|
| <b>Salmonella enterica serovar Typhimurium 14028s</b> |                                                                                  |            |
| ZD004                                                 | Wild type ( <i>pbgA+</i> ) <i>wza-lacZ</i>                                       | (1)        |
| ZD002                                                 | <i>pbgA</i> Δ1328-586:: <i>tetRA wza-lacZ</i>                                    | (2)        |
| ZD003                                                 | <i>pbgA</i> Δ191-586:: <i>tetRA wza-lacZ</i>                                     | (2)        |
| ZD017                                                 | <i>pbgA</i> Δ191-586:: <i>tetRA lapB-Q112K wza-lacZ</i>                          | (3)        |
| ZD018                                                 | <i>pbgA</i> Δ191-586:: <i>tetRA ftsH-R299C wza-lacZ</i>                          | (3)        |
| ZD019                                                 | <i>pbgA</i> Δ191-586:: <i>tetRA lpxC-Y113C wza-lacZ</i>                          | (3)        |
| ZD020                                                 | <i>pbgA</i> Δ191-586:: <i>tetRA lapB-R273P,R274S wza-lacZ</i>                    | (3)        |
| <b>Plasmids</b>                                       |                                                                                  |            |
| pBAD24- <i>empty</i>                                  | pBAD24 expression vector                                                         | (4)        |
| pBAD-PbgA-FL                                          | PbgA(1-586) transmembrane protein                                                | (2)        |
| pBAD-PbgA R215A R216A                                 | Alanine-substituted R215 and R216 in the PbgA(1-586) transmembrane protein       | This study |
| pBAD-PbgA R215K R216K                                 | Lysine substituted R215 and R216 in the PbgA(1-586) transmembrane protein        | This study |
| pBAD-PbgA R215D R216D                                 | Aspartic acid substituted R215 and R216 in the PbgA(1-586) transmembrane protein | This study |
| pBAD-PbgA R231A R232A                                 | Alanine substituted R231 and R232 in the PbgA(1-586) transmembrane protein       | This study |
| pBAD-LpxC                                             | LpxC protein                                                                     | This study |

677

678

679

680 **Table 2. Primers used in this study**

| Primer name        | Primer sequence (5' → 3')                                 |
|--------------------|-----------------------------------------------------------|
| PbgA R215,215A Fwd | AGACCGTGTTTTTCAAGAAAAGCTGCCGCCGTCA<br>TCGGATAAGAGAG       |
| PbgA R215,216A Rev | CTCTCTTATCCGATGACGGCGGCAGCTTTTCTTG<br>AAAAACACGGTCT       |
| PbgA R215,215K Fwd | CAGCAGACCGTGTTTTTCAAGAACTTTTTCGCC<br>GTCATCGGATAAGAGAGCGG |
| PbgA R215,215K Rev | CCGCTCTTATCCGATGACGGCGAAAAAGTTT<br>CTTGAAAAACACGGTCTGCTG  |
| PbgA R215,215D Fwd | GCAGACCGTGTTTTTCAAGAAAATCATCCGCCGT<br>CATCGGATAAGAGAGCG   |
| PbgA R215,215D Rev | CGCTCTTATCCGATGACGGCGGATGATTTTCT<br>TGAAAAACACGGTCTGC     |
| PbgA R231,232A Fwd | TTGCCTTGCTCTACCAGAGCGGCCTGATATTCCT<br>GCGCATC             |
| PbgA R231,232A Rev | GATGCGCAGGAATATCAGGCCGCTCTGGTAGAG<br>CAAGGCAA             |
| pBAD seq Fwd       | CTGTTTCTCCATACCCGTT                                       |
| pBAD seq Rev       | GGCTGAAAATCTTCTCT                                         |
| LpxC_for_Xba1      | GCCAAATCTAGAATGATCAAACAAAGGACACTTAAAC                     |
| LpxC_rev_HindIII   | AAAAGCTTTTATGCCAGTACCGTCGAAGG                             |

681  
682  
683  
684

**References:**

- 685 1. Farris C, Sanowar S, Bader MW, Pfuetzner R, Miller SI. 2010. Antimicrobial  
686 peptides activate the Rcs regulon through the outer membrane lipoprotein RcsF.  
687 J Bacteriol 192:4894-903.
- 688 2. Dalebroux ZD, Edrozo MB, Pfuetzner RA, Ressler S, Kulasekara BR, Blanc MP,  
689 Miller SI. 2015. Delivery of cardiolipins to the Salmonella outer membrane is  
690 necessary for survival within host tissues and virulence. Cell Host Microbe  
691 17:441-51.

- 692 3. Cian MB, Giordano NP, Masilamani R, Minor KE, Dalebroux ZD. 2019.  
693 Salmonella enterica Serovar Typhimurium Uses PbgA/YejM To Regulate  
694 Lipopolysaccharide Assembly during Bacteremia. Infect Immun 88.
- 695 4. Guzman LM, Belin D, Carson MJ, Beckwith J. 1995. Tight regulation, modulation,  
696 and high-level expression by vectors containing the arabinose PBAD promoter. J  
697 Bacteriol 177:4121-30.
- 698

699 **FIGURE LEGENDS**

700 **Figure 1. *Salmonella enterica* serovar Typhimurium uses the periplasmic domain**

701 **(PD) of PbgA (residues 191-586) to negatively regulate LpxC expression in**

702 **response to stress.** (A) Bacterial growth in LB broth. Growth was measured from five

703 biological replicates, each initiated from a single colony re-suspension and conducted

704 as outlined in *materials and methods* section with OD<sub>600</sub> readings every 15 minutes for

705 24 hours. Points on the graph represent mean OD<sub>600</sub> readings at 1-hour intervals and

706 error bars represent the standard error. Asterisks represent the points at which samples

707 were taken for assays. Log phase was defined as OD<sub>600</sub>=0.6-0.8 and stationary phase

708 as 16 hours) (B) Plasmid-bearing *S. Typhimurium* genotypes were grown in 1L of Luria-

709 Bertani (LB) broth supplemented with 100µg/mL ampicillin to the stationary phase of

710 growth. Soluble fractions were concentrated and probed for LpxC abundance. (C) A

711 polyclonal antibody to LpxC (MyBioSource) was used to probe LpxC levels in

712 concentrated soluble fractions isolated from 1L of LB broth. Asterisk denotes the 33kD

713 band that is enriched in *pbgA*Δ191-586 mutants.

714

715 **Figure 2. *S. Typhimurium* requires the PbgA PD to decrease lipid A-core levels**

716 **during stationary phase stress** (A) Each genotype was grown with aeration at 37°C in

717 5mL of LB broth supplemented with ampicillin (100µg/mL) to the log (OD<sub>600</sub>=0.6-0.8) or

718 the stationary phase. Basal expression from the pBAD promoter without adding inducer

719 or repressor was optimal for genetic transcomplementation and phenotype rescue of the

720 *pbgA*Δ191-586 deletion-insertion genotype. LPS was extracted using a hot-phenol

721 method and visualized using ProQ Emerald 300 (Thermo). (B) The levels of the lipid A-



722 core LPS precursor (LA-C) and short LPS species (S1-S4) were quantified for stationary  
723 phase LPS using the images and densitometry. Images were obtained using the  
724 ChemiDoc™ MP Imaging System (BioRad) and densitometric analysis was performed  
725 using BioRad Image Lab® 6.0 Software. All densitometric measurements were  
726 normalized to the corresponding band for the wild type strain in the same gel. Three  
727 biological replicates were quantified. Values are represented as mean ± standard error.  
728 Significance was determined using Tukey's multiple comparisons ( $p < 0.0001$ ) and is  
729 denoted by number symbol (#), up arrow (^), plus sign (+), or the "at" sign (@) to show  
730 significance from wild type, *pbgAΔ191-586*, *pbgAΔ328-586*, or the complemented  
731 mutant, respectively. All reached a p-value of  $< 0.0001$ , with the exception of the  
732 comparison between *pbgAΔ328-586* and the complemented mutant, which reached a p-  
733 value  $< 0.01$ .

734

735 **Figure 3. The cationic charge of PbgA R215 R216, but not PbgA R231 R232, is**  
736 **necessary for the negative regulation of LpxC.** (A) The three-dimensional crystal  
737 structure of PbgA/YejM from *S. Typhimurium* is depicted (PDB number: 6XLP) and  
738 reveals the transmembrane domain (pink), periplasmic basic region (blue), and  
739 periplasmic globular region (orange) (34). PbgA R215 R216 is highlighted in red. (B)  
740 The inset depicts a close-up of the interactions between the PbgA basic region and 1-  
741 phospho-GlcNAc of lipid A-core (tan) at residues Y210 (backbone), T213 (backbone  
742 and side chain), R215 (backbone), and R216 (backbone and side chain). Atoms are  
743 colored according to charge with the cationic charges in blue and anionic charges in  
744 red. (C) PbgA R215A R216A, PbgA R215K R216K, and PbgA R231A R232A are stably

745 expressed in *S. Typhimurium*, but PbgA R215D R216D mutants are possibly unstable.  
746 A polyclonal antibody cleared from rabbit antisera raised to purified PbgA<sup>191-586</sup>  
747 polypeptide was used to probe PbgA expression in total membrane fractions isolated  
748 from 0.5L of stationary phase broth culture. (D) The cationic charge of R215 R216 is  
749 necessary to negatively regulate LpxC. Site-directed amino acid substitution  
750 mutagenesis was used to test the role of R215 R216 and R231 R232 in LpxC  
751 expression. Both arginine pairs were substituted with neutral alanine residues and the  
752 R215 R216 pair were further substituted with conservative and non-conservative charge  
753 substitutions. The plasmid-borne alleles were introduced into the *pbgAΔ191-586*  
754 deletion-insertion genotype. LpxC levels were probed by immunoblotting soluble  
755 fractions of bacteria electrophoresed on an SDS-PAGE gel after growth in 1L broth  
756 culture to stationary phase. This blot represents one of six independent experiments.  
757 The asterisk represents the addition of 0.02% arabinose, which was used for  
758 overexpression (36).

759

760 **Figure 4. The cationic charge of PbgA R215 R216, but not PbgA R231 R232, is**  
761 **necessary for *S. Typhimurium* to negatively regulate LPS biosynthesis.** (A) Strains  
762 carrying conservative, non-conservative, and neutral charge substitutions in the arginine  
763 pairs described in were grown in 5mL cultures to stationary phase. The LPS molecules  
764 were extracted and visualized. (B) The levels of lipid A-core, an O-antigen deficient LPS  
765 precursor, and four short O-antigen containing LPS molecules were quantified using  
766 densitometry and BioRad Image Lab<sup>®</sup>. Six biological replicates were cultured, extracted,  
767 electrophoresed, stained, and quantified to generate the average values depicted here.

768 Data is represented as mean  $\pm$  standard error. Statistical significance was calculated  
769 using Tukey's multiple comparisons test. Symbols denote significance as follows: #,  
770 *pbgA*<sup>+</sup> pEmpty; ^, *pbgA* $\Delta$ 191-586 pEmpty; +, *pbgA* $\Delta$ 328-586 pEmpty; @, *pbgA* $\Delta$ 191-586  
771 pPbgA; &, PbgA R215K R216K; \$, PbgA R215D R216D (p<0.0332).

772

773 **Figure 5. *S. Typhimurium* use the cationic charge of PbgA R215 R216 to survive**

774 **in primary murine macrophages.** Primary bone marrow derived macrophages

775 (BMDMs) from C57Bl/6J mice were infected at a multiplicity of infection of 10:1 with the

776 indicated bacterial strains. Each strain was assessed for intracellular survival in

777 triplicate across three experiments for a total of nine wells at two- and six-hours post-

778 infection. Data is represented as mean  $\pm$  standard deviation. Significance was

779 determined using Tukey's multiple comparisons test. Symbols denote significance as

780 follows: #, *pbgA*<sup>+</sup> pEmpty; ^, *pbgA* $\Delta$ 191-586 pEmpty; +, *pbgA* $\Delta$ 328-586 pEmpty; @,

781 *pbgA* $\Delta$ 191-586 pPbgA; &, PbgA R215K R216K; \$, PbgA R215D R216D (p<0.0332).

782

783 **Figure 6. *S. Typhimurium* require electrostatic interactions mediated by the PbgA**

784 **basic region for colonization of C57Bl/6J mice.** Mice were intraperitoneally injected

785 with roughly 10<sup>5</sup> cfu of one of the indicated bacterial strains suspended in 200 $\mu$ L PBS.

786 Two days later, they were euthanized and their livers (A) and spleens (B) were

787 harvested, homogenized, and plated for CFU. Data is normalized to organ weight and

788 represented as mean  $\pm$  standard deviation. Statistical significance was calculated using

789 the Kruskal-Wallis test for multiple comparisons (\*, p<0.0332, \*\*p<0.0021, \*\*\*,

790 p<0.0002).

791 **Figure 7. *S. Typhimurium* uses conserved arginine pairs, R215 R216 and R231**  
792 **R232, to cause lethality in mice.** C57Bl/6J (A) and Tlr4 knock out (B) mice were  
793 intraperitoneally injected with roughly  $10^3$  cfu of one of the indicated bacterial strains  
794 suspended in PBS. The wild-type strain, complemented mutant, and PbgA R215K  
795 R216K exhibited toxicity towards both strains of mice, which survived to an average of  
796 5, 7, and 7 days, respectively, in the wild-type animals (A) and an average of 3, 7, and 7  
797 days, respectively, for the Tlr4-deficient animals (B). All mice infected with *pbgA*<sup>Δ191-586</sup>  
798 pEmpty, *pbgA*<sup>Δ328-586</sup> pEmpty, PbgA R215A R216A, and PbgA R215D R216D survived  
799 to the 21-day end point. Tlr4 deficient mice infected with PbgA R231A R232A  
800 succumbed to disease by day 13 post-infection, while wild-type animals did not  
801 succumb to disease in the 21-day period (B). Significance was calculated using the Log  
802 rank (Mantel-Cox) test and symbols indicate statistical significance compared to wild-  
803 type, (\*, p<0.01; #, p<0.0001).

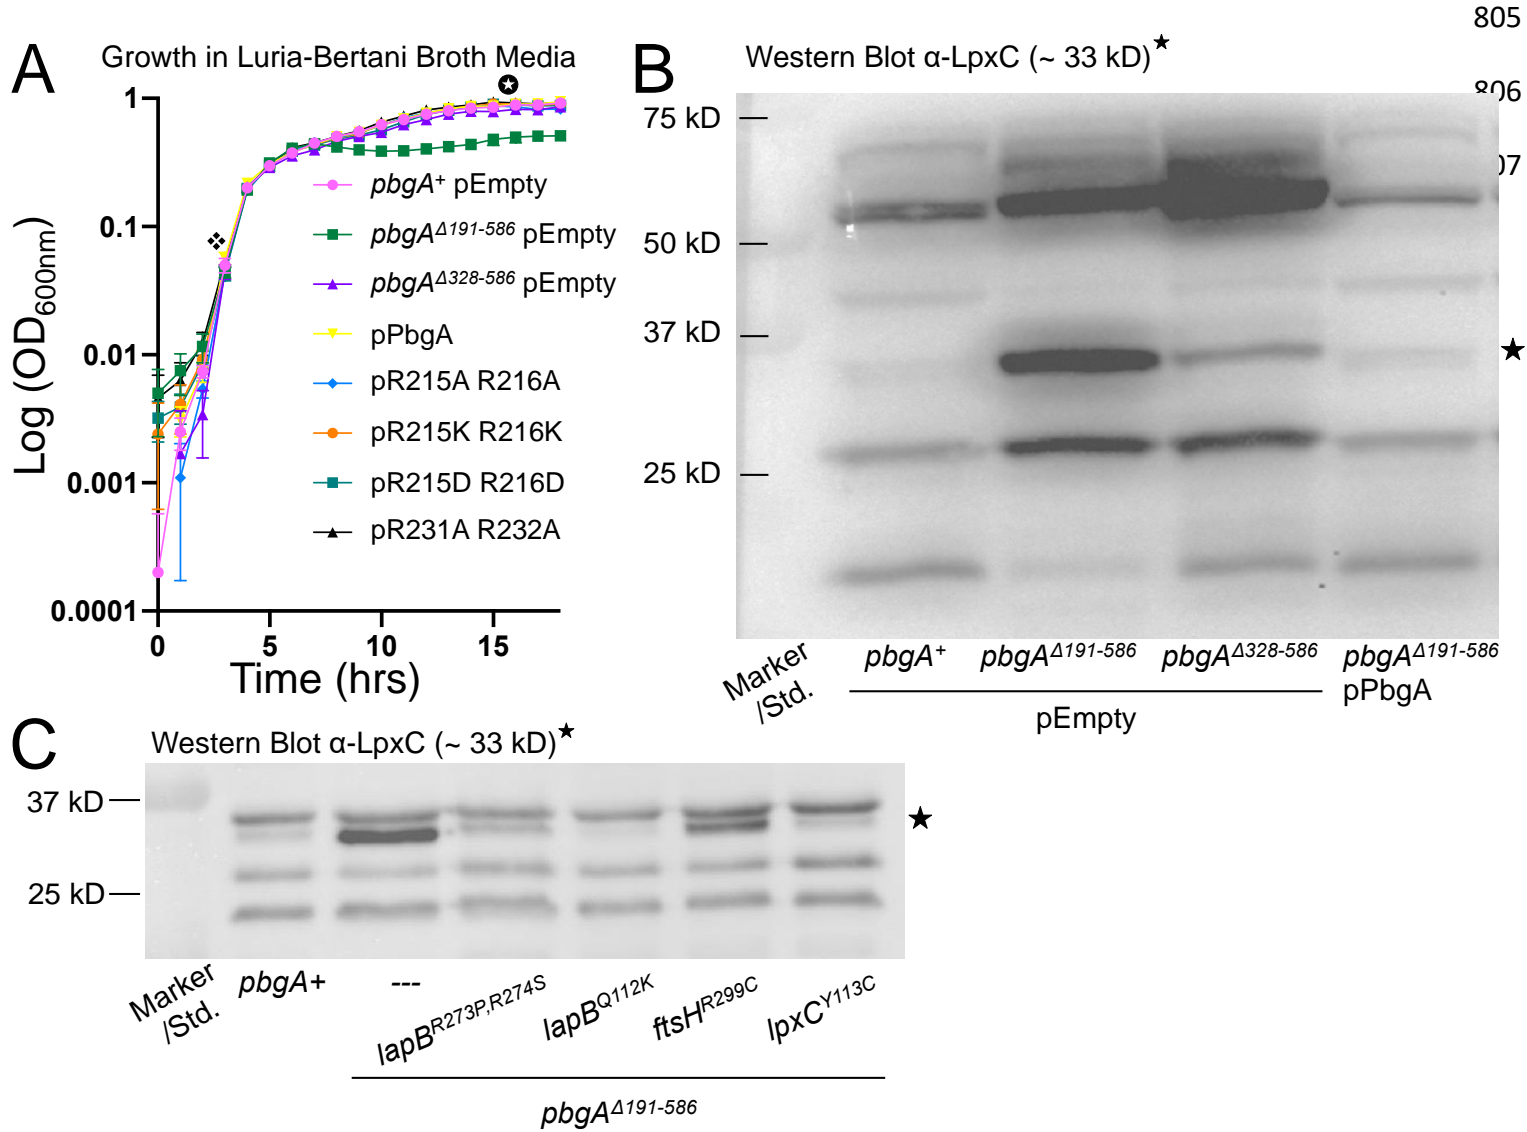

808 **Figure 2.**

809

810

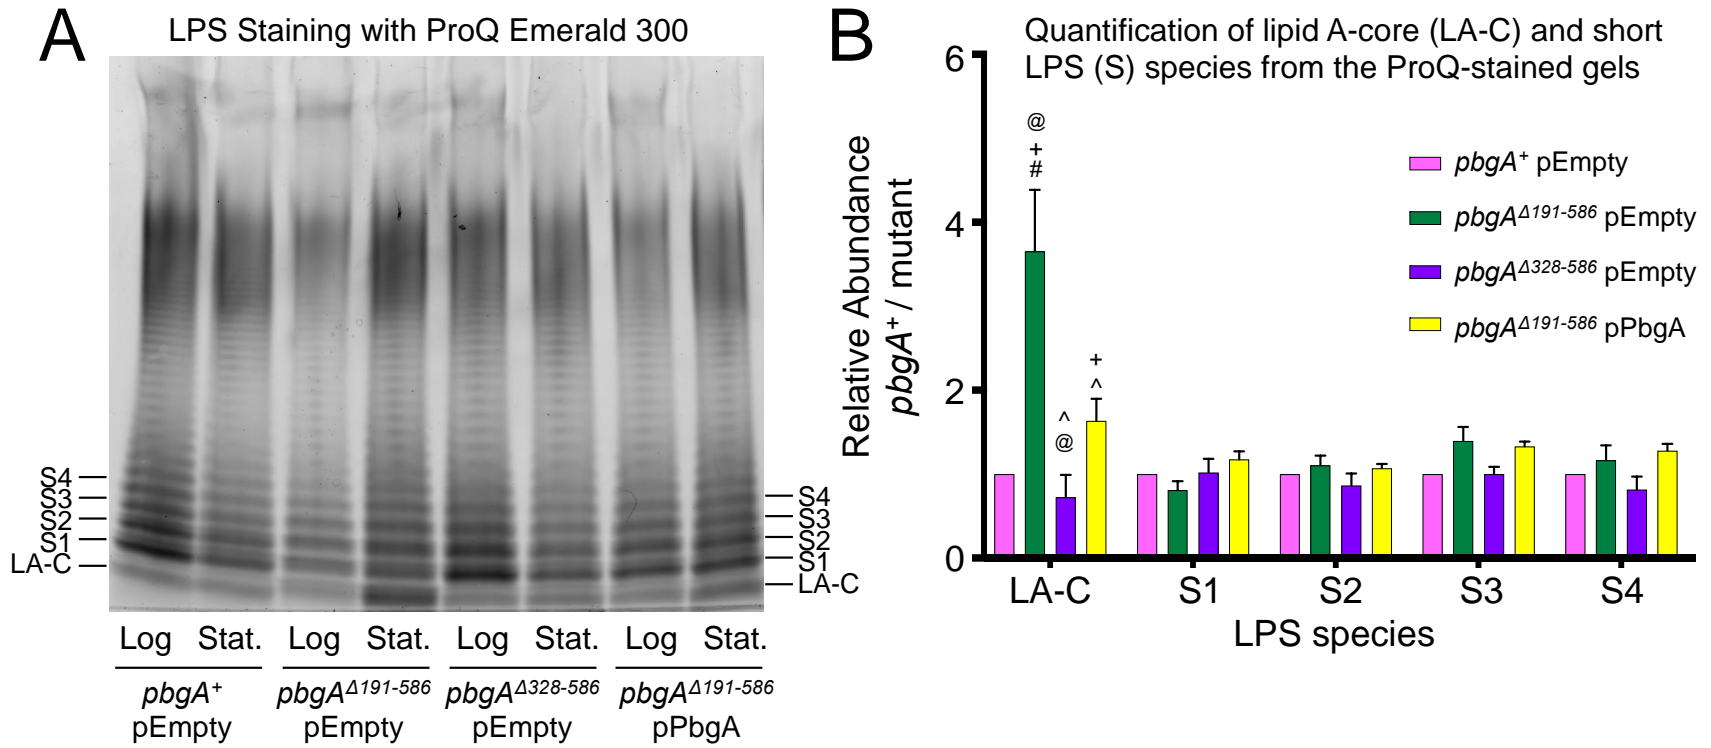

811 **Figure 3.**

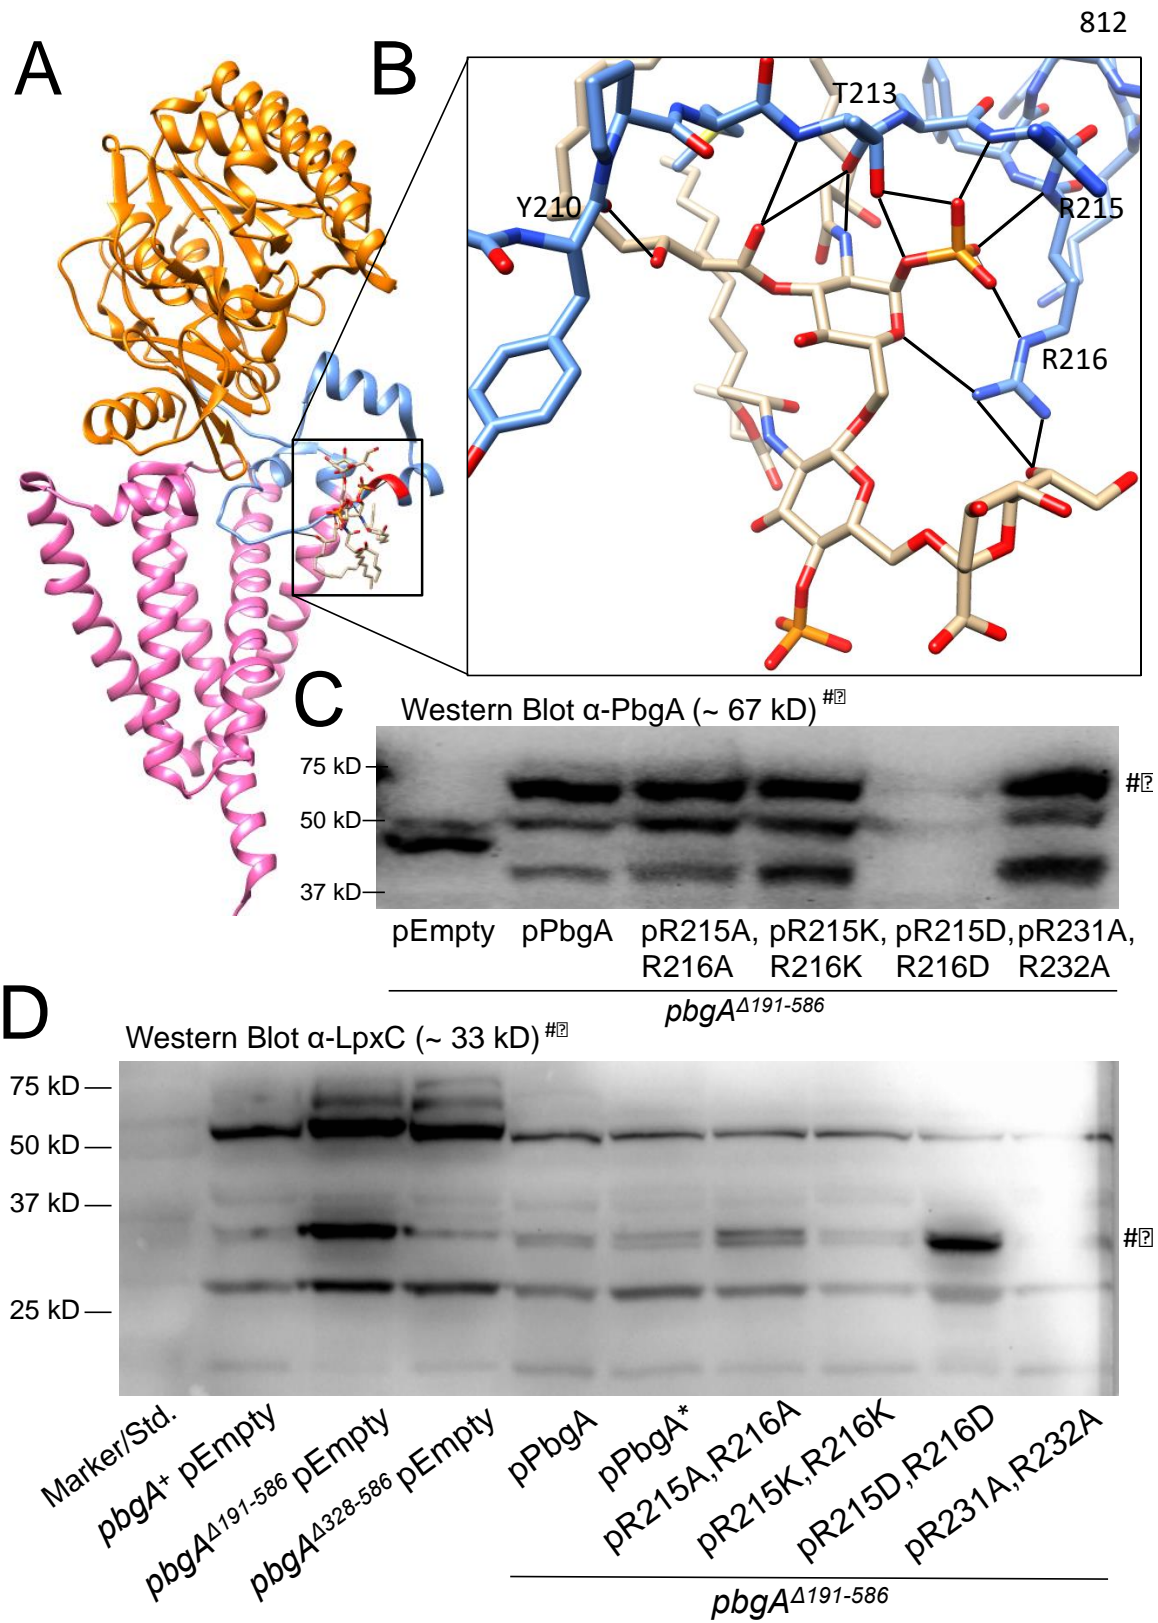



813 **Figure 4.**

814

815

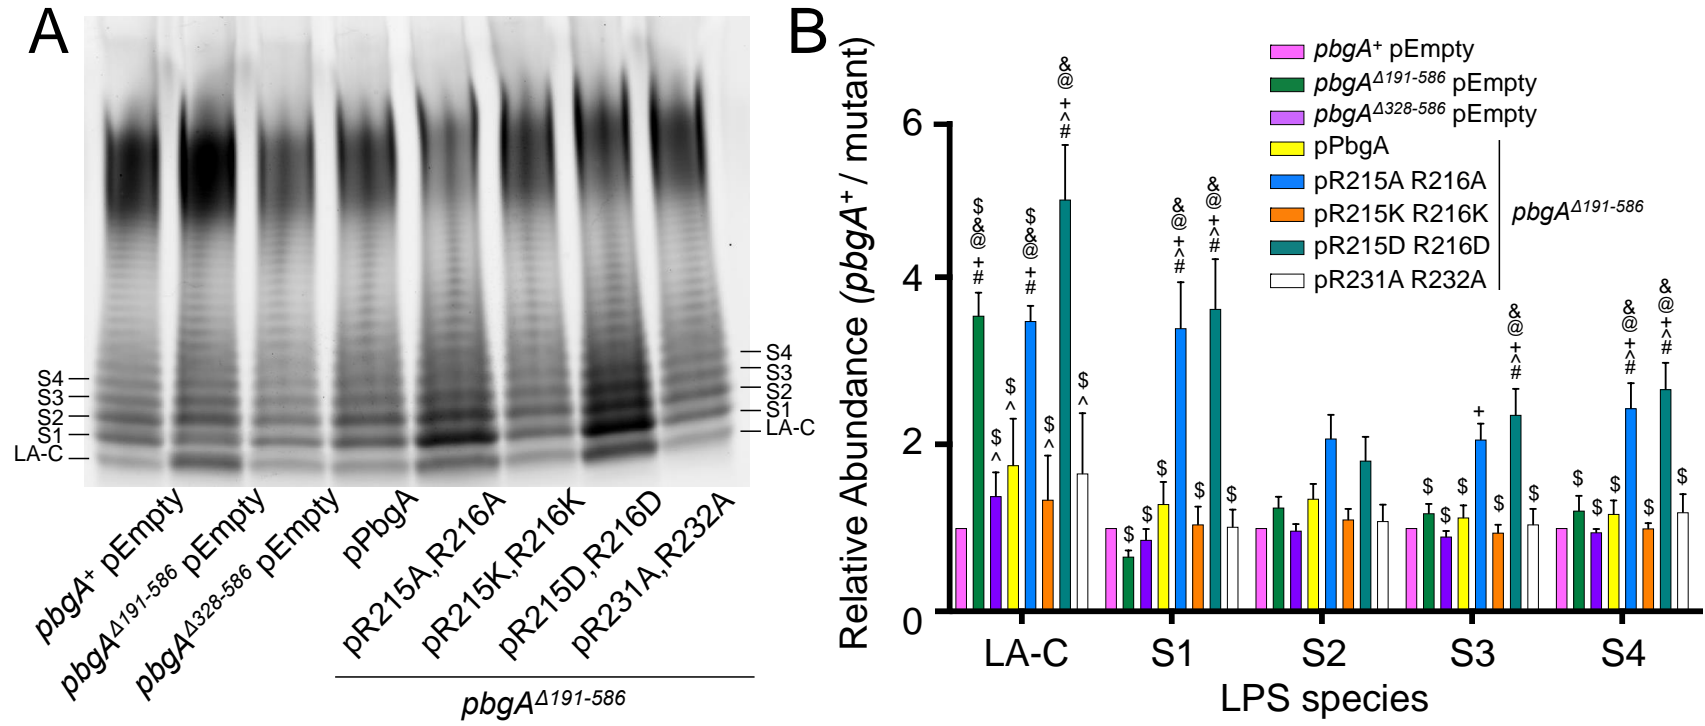



816 **Figure 5.**

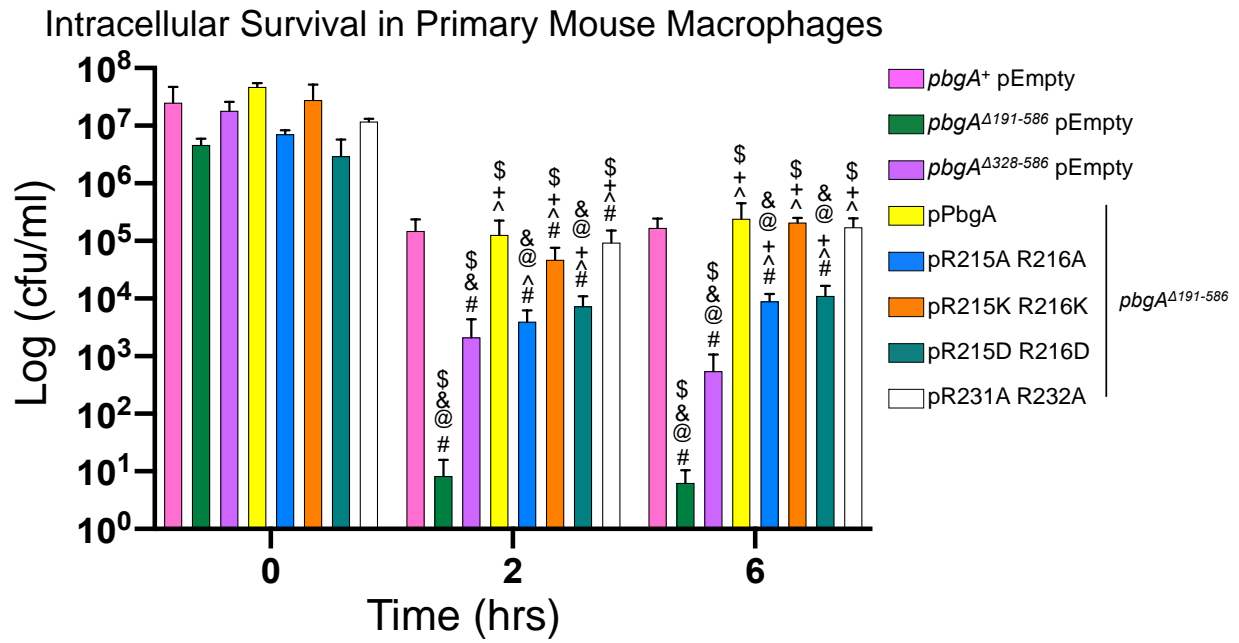

817 **Figure 6.**

818

819

**A** C57Bl/6J mice i.p. w/  $10^5$  cfu 48 hpi  
LIVER

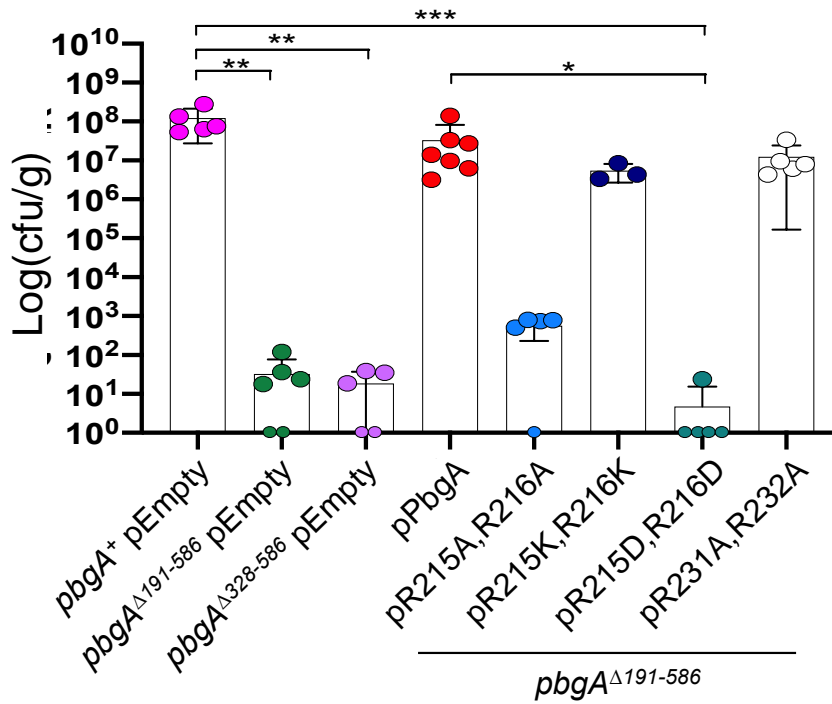

**B** C57Bl/6J mice i.p. w/  $10^5$  cfu 48 hpi  
SPLEEN

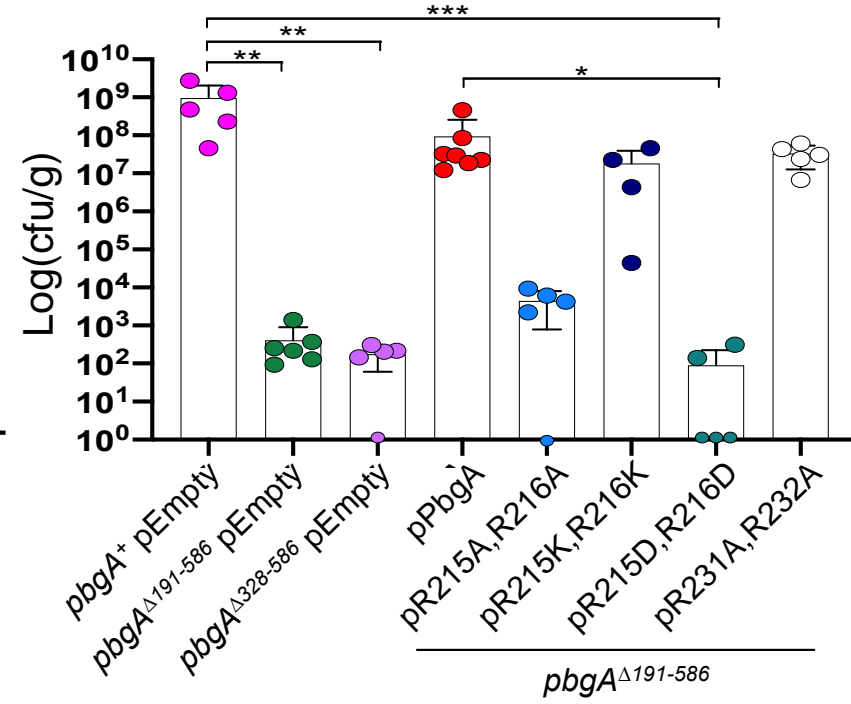

820 **Figure 7.**

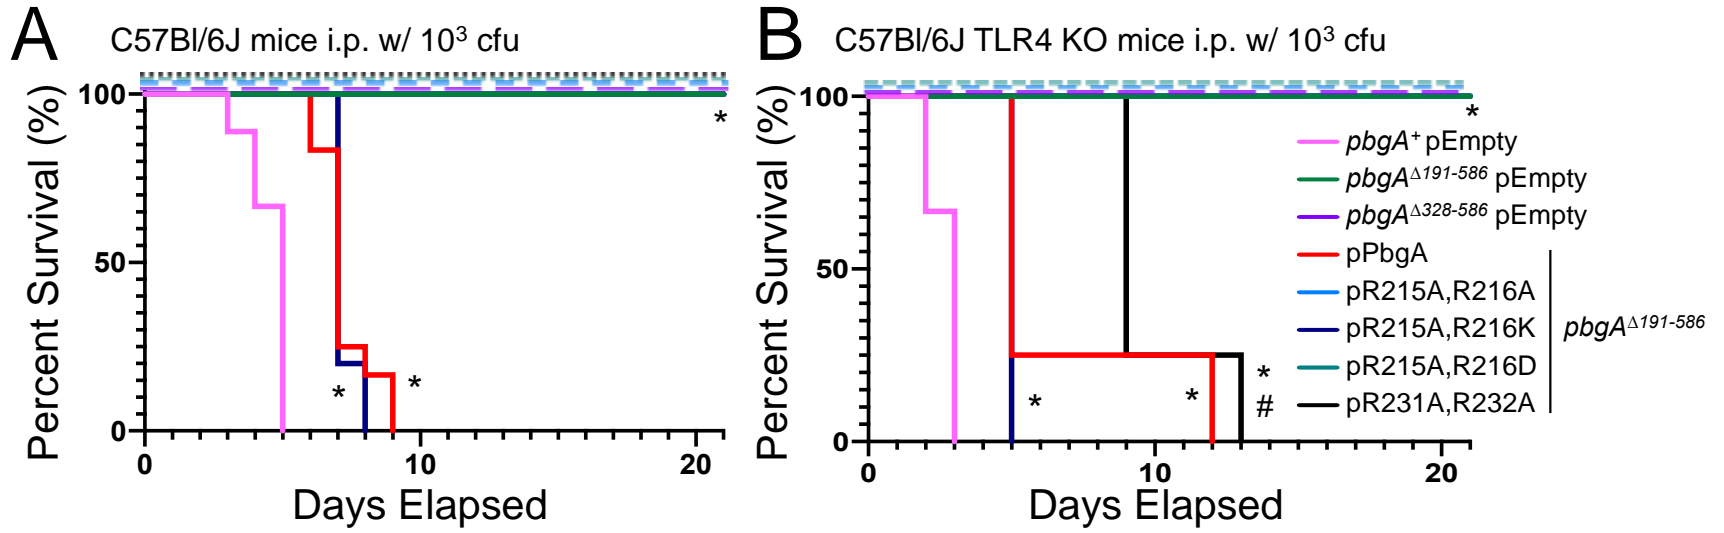

821
